# Supplementary material
Source: PubMed Central journal article supplement (PMC7655425)
Supplement: 17-01184.pdf [file 17-01184.pdf]

**On-line Table: Predictors of ischemic complications**

| Parameter                                  | No Complications<br>(n = 100) | Complications<br>(n = 29) | P Value     |                                    |
|--------------------------------------------|-------------------------------|---------------------------|-------------|------------------------------------|
|                                            |                               |                           | Univariable | Multivariable                      |
| Sex                                        |                               |                           |             |                                    |
| Female                                     | 66 (80.5%)                    | 16 (19.5%)                | .29         | —                                  |
| Male                                       | 34 (72.3%)                    | 13 (27.7%)                |             |                                    |
| Median age (range) (yr)                    | 58 (29–78)                    | 54 (29–82)                | .86         | —                                  |
| Smoking <sup>a</sup>                       |                               |                           |             |                                    |
| Yes                                        | 36 (90%)                      | 4 (10%)                   | .02         | OR, 0.2; 95% CI, 0.05–0.7; P = .01 |
| No                                         | 57 (71.3%)                    | 23 (28.8%)                |             |                                    |
| Presenting symptoms                        |                               |                           |             |                                    |
| Asymptomatic                               | 23 (82.1%)                    | 5 (17.9%)                 | .2          | —                                  |
| Headache/dizziness                         | 26 (8.7%)                     | 4 (13.3%)                 |             |                                    |
| Neurologic deficit                         | 51 (71.8%)                    | 20 (28.2%)                |             |                                    |
| Subarachnoid hemorrhage                    |                               |                           |             |                                    |
| No                                         | 69 (75.8%)                    | 22 (24.2%)                | .17         | —                                  |
| Acute (<24 hr)                             | 6 (100%)                      | 0%                        |             |                                    |
| Immediate (<2 wk)                          | 13 (92.9%)                    | 1 (7.1%)                  |             |                                    |
| Remote (>2 wk)                             | 12 (66.7%)                    | 6 (33.3%)                 |             |                                    |
| Pretreatment mRS                           |                               |                           |             |                                    |
| 0–2                                        | 81 (80.2%)                    | 20 (19.8%)                | .17         | —                                  |
| 3–5                                        | 19 (67.9%)                    | 9 (32.1%)                 |             |                                    |
| Aneurysm location                          |                               |                           |             |                                    |
| VA                                         | 38 (84.4%)                    | 7 (15.6%)                 | .48         | —                                  |
| Vertebrobasilar artery                     | 13 (72.2%)                    | 5 (27.8%)                 |             |                                    |
| PICA                                       | 8 (88.9%)                     | 1 (11.1%)                 |             |                                    |
| Basilar artery                             | 32 (69.6%)                    | 14 (30.4%)                |             |                                    |
| SCA                                        | 2 (66.7%)                     | 1 (33.3%)                 |             |                                    |
| PCA                                        | 7 (87.5%)                     | 1 (12.5%)                 |             |                                    |
| Aneurysm shape                             |                               |                           |             |                                    |
| Saccular                                   | 36 (76.6%)                    | 11 (23.4%)                | .7          | —                                  |
| Fusiform                                   | 38 (74.5%)                    | 13 (25.5%)                |             |                                    |
| Dissecting                                 | 24 (82.8%)                    | 5 (17.2%)                 |             |                                    |
| Aneurysm measurements                      |                               |                           |             |                                    |
| Maximal diameter                           |                               |                           |             |                                    |
| <7 mm                                      | 18 (81.8%)                    | 4 (18.2%)                 | .11         | —                                  |
| 7–12 mm                                    | 38 (88.4%)                    | 5 (11.6%)                 |             |                                    |
| 13–24 mm                                   | 27 (69.2%)                    | 12 (30.8%)                |             |                                    |
| >24 mm                                     | 17 (68%)                      | 8 (32%)                   |             |                                    |
| Daughter sac                               |                               |                           |             |                                    |
| Yes                                        | 21 (80.8%)                    | 5 (19.2%)                 | .66         | —                                  |
| No                                         | 79 (76.7%)                    | 24 (23.3%)                |             |                                    |
| Intra-aneurysmal thrombus                  |                               |                           |             |                                    |
| Yes                                        | 25 (64.1%)                    | 14 (35.9%)                | .02         | OR, 2.7; 95% CI, 0.9–7.8; P = .06  |
| No                                         | 75 (83.3%)                    | 15 (16.7%)                |             |                                    |
| Prior treatment                            |                               |                           |             |                                    |
| No                                         | 84 (75%)                      | 28 (25%)                  | .37         | —                                  |
| Endovascular                               | 13 (92.9%)                    | 1 (7.1%)                  |             |                                    |
| Surgery                                    | 2 (100%)                      | 0%                        |             |                                    |
| Both                                       | 1 (100%)                      | 0%                        |             |                                    |
| Platelet function testing                  |                               |                           |             |                                    |
| Yes                                        | 64 (83.1%)                    | 13 (16.9%)                | .06         | —                                  |
| No                                         | 36 (69.2%)                    | 16 (30.8%)                |             |                                    |
| Clopidogrel responders <sup>b</sup>        |                               |                           |             |                                    |
| Yes                                        | 54 (85.7%)                    | 9 (14.3%)                 | .2          | —                                  |
| No                                         | 10 (71.4%)                    | 4 (28.6%)                 |             |                                    |
| Adjunctive coiling                         |                               |                           |             |                                    |
| Yes                                        | 33 (82.5%)                    | 7 (17.5%)                 | .36         | —                                  |
| No                                         | 67 (75.3%)                    | 22 (24.7%)                |             |                                    |
| No. of Pipelines deployed (median) (range) | 1 (1–14)                      | 2 (1–9)                   | .03         | OR, 1.1; 95% CI, 0.9–1.4; P = .4   |
| Length of procedure (median) (range) (min) | 104 (22–360)                  | 145 (42–410)              | .04         | OR, 1; 95% CI, 0.9–1.01; P = .1    |
| Branch status                              |                               |                           |             |                                    |
| Covered                                    | 76 (73.8%)                    | 27 (26.2%)                | .04         | OR, 2.6; 95% CI, 0.5–12.4; P = .24 |
| Not covered                                | 24 (92.3%)                    | 2 (7.7%)                  |             |                                    |
| No. of covered branches                    |                               |                           |             |                                    |
| ≤2                                         | 47 (71.2%)                    | 19 (28.8%)                | .43         | —                                  |
| >2                                         | 29 (78.4%)                    | 8 (21.6%)                 |             |                                    |
| Covered branches status                    |                               |                           |             |                                    |
| Occluded                                   | 18 (85.7%)                    | 3 (14.3%)                 | .16         | —                                  |
| Not occluded                               | 58 (70.7%)                    | 24 (29.3%)                |             |                                    |

**Note:**—SCA indicates superior cerebellar artery.

<sup>a</sup> Data are missing in 9 procedures.

<sup>b</sup> Among patients with platelet function testing.
